1 Metabolic flux fingerprinting differentiates planktonic and biofilm states of  
2 *Pseudomonas aeruginosa* and *Staphylococcus aureus*

3  
4 Mads Lichtenberg<sup>a\*1</sup>, Kasper Nørskov Kragh<sup>a,c,1</sup>, Blaine Fritz<sup>a</sup>, Julius Bier-Kirkegaard<sup>b</sup>, Thomas  
5 Bjarnsholt<sup>a,c\*</sup>

6  
7 <sup>a</sup> Costerton Biofilm Center, Department of Immunology and Microbiology, University of Copenhagen, Denmark

8 <sup>b</sup> Niels Bohr Institute, University of Copenhagen, Denmark

9 <sup>c</sup> Department of Clinical Microbiology, Copenhagen University Hospital, Copenhagen, Denmark

10 <sup>1</sup> Authors contributed equally

11 \* Corresponding authors:

12 [tbjarnsholt@sund.ku.dk](mailto:tbjarnsholt@sund.ku.dk)

13 [mlichtenberg@sund.ku.dk](mailto:mlichtenberg@sund.ku.dk)

14

15

16

17

18

19 **Keywords:** Alginate beads, biofilm, biomarker, machine learning, metabolism, microcalorimetry

20 **Abstract**

21 The challenges of defining the biofilm phenotype has been clear for decades. Many biomarkers for  
22 biofilm are known, but methods for identifying these are often invasive and/or complicated. These  
23 methods often rely on disrupting the biofilm matrix or examining virulence factors and compounds,  
24 which may only be expressed under certain conditions.

25 We used microcalorimetric measurements of metabolic energy release to investigate whether  
26 unchallenged, planktonic *Pseudomonas aeruginosa* displayed differences in metabolism compared  
27 to surface-bound and non-attached biofilms.

28 The pattern of energy release observed in the recorded microcalorimetric thermograms clearly  
29 depended on growth state, though the total energy expenditure was not different between growth  
30 states. To characterize these differences, we developed a classification pipeline utilizing machine  
31 learning algorithms to classify growth state, based on the observed patterns of energy release. With  
32 this approach, we could with high accuracy detect the growth form of blinded samples. To challenge  
33 the algorithm, we attempted to limit the amount of training data. By training the algorithm with only  
34 a single data point from each growth form, we obtained a mean accuracy of 90.5% using two principal  
35 components. Further validation of the classification pipeline showed that the approach was not limited  
36 to *P. aeruginosa* but could also be used for detection of gram-positive *Staphylococcus aureus* biofilm.  
37 We propose that microcalorimetric measurements, in combination with this new quantitative  
38 framework, can be used as a non-invasive biomarker to detect the presence of biofilm.

39 These results could have a significant potential in clinical settings where the detection of biofilms in  
40 infections often means a different outcome and treatment regime for the patient.

41

42

## 43 **Introduction**

44 Bacteria residing in biofilms are thought to be phenotypically distinct from their planktonic  
45 counterparts. Many publications have identified specific biomarkers to characterize this distinction,  
46 such as differential gene expression (Folsom *et al.*, 2010), secretion of extracellular polymers  
47 (Costerton *et al.*, 1995; Goltermann and Tolker-Nielsen, 2017), virulence factors (Hauser, 2011),  
48 metabolism (Solokhina *et al.*, 2017) and increased tolerance towards antibiotics and host response  
49 (Bjarnsholt *et al.*, 2013; Ciofu and Tolker-Nielsen, 2019). However, physical aggregation (observed  
50 by microscopy) and increased antibiotic tolerance are the most dominant and consistent of these  
51 biofilm-associated phenotypes. Traditionally, biofilm research has focused on surface-attached  
52 biofilms, but there is an increasing focus on embedded and non-attached biofilm aggregates (Secor  
53 *et al.*, 2018; Alhede *et al.*, 2011; Kragh *et al.*, 2016). In the majority of biofilm-related infections,  
54 bacteria are found as non-attached aggregates embedded in host material, such as slough or mucus  
55 (Bjarnsholt *et al.*, 2013). The difference in growth geometry between planktonic bacteria, surface-  
56 attached, and non-attached biofilms may result in distinctive microenvironments (Stewart and  
57 Franklin, 2008; Stewart *et al.*, 2016; 2019), which could differentially impact the metabolic activity  
58 and number of bacteria aggregating (Sønderholm *et al.*, 2018) and vice versa.

59 The increased tolerance of biofilms toward antibiotics is frequently attributed to a lower metabolic  
60 rate (Kolpen *et al.*, 2017), upregulated efflux pumps (Frimodt-Møller *et al.*, 2018; Bartell *et al.*,  
61 2019), protection by matrix components (Tseng *et al.*, 2013; Cao *et al.*, 2016) or SOS responses  
62 (Nguyen *et al.*, 2011; Bernier *et al.*, 2013), and is determined by direct exposure to antibiotics and  
63 measure of killing either by plating and enumeration of surviving colony forming units (CFU) or  
64 live/dead staining. The CFU method, however, can be slow and prone to biases, such as counting  
65 aggregates as single CFUs or false negatives due to the induction of viable but non-culturable state  
66 of the bacteria (Kvich *et al.*, 2019). Similarly, live/dead staining may overestimate the proportion of  
67 dead cells, due to the binding of propidium iodide to eDNA (Rosenberg *et al.*, 2019).

68 A measurable biomarker is needed in order to move the field forward and improve our understanding  
69 of the difference between bacteria living as single-cells or in biofilms (Jefferson, 2004).

70 Non-invasive measurements of activity in biofilms are not trivial, as many current methods rely on  
71 disrupting the biofilm and altering the chemical microenvironment, though some genetic (Poulsen *et al.*,  
72 1993; Kragh *et al.*, 2014) and chemical reporters do exist (Corte *et al.*, 2019). Most of these  
73 methods, however, only cover part of the metabolic output linked to, e.g., growth or production of  
74 molecules produced under certain conditions (Whooley and McLoughlin, 1982; Poulsen *et al.*, 1993).

75 Since metabolic activity seems to play a distinguishing role between bacteria in planktonic- and  
76 biofilm states, a fine-scale measurement of energy release could be a biomarker of interest.  
77 Microcalorimetry has been used in material research for decades, but is gaining interest in life  
78 sciences (Braissant *et al.*, 2015; Baldoni *et al.*, 2009; Butini *et al.*, 2019; Tellapragda *et al.*, 2020).  
79 This technique records energy release in the form of heat flow, providing a real-time measurement of  
80 the population-level metabolic activity in a sample (Braissant *et al.*, 2015; Wadsö *et al.*, 2017).  
81 In the present study, we examined the heat flow of planktonic bacteria (PC) and biofilm-associated  
82 bacteria (Fig. 1) using non-invasive, isothermal microcalorimetry. Due to the increased focus on non-  
83 attached biofilm aggregates, we also compared the metabolism of non-attached aggregates embedded  
84 in alginate beads (AB) with surface-attached biofilms (SB) (Alhede *et al.*, 2011; Sønderholm *et al.*,  
85 2017b).  
86 We aimed to investigate whether bacteria growing in biofilms displayed distinct metabolic features  
87 compared to the planktonic state.

88

## 89 **Results**

### 90 Metabolic activity of alginate bead biofilms, surface-attached biofilms and planktonic culture

91 After equilibration of the thermal signal (~30 min), all three models containing *P. aeruginosa* showed  
92 signal increases. Thermograms from all models showed 2-3 peaks in heat flow, but the position and  
93 magnitude of the peaks varied between models.

94 The accumulated energy in each well was  $2.19 \text{ J} \pm 0.17$  (mean  $\pm$  SD) and did not vary within or  
95 between conditions ( $p > 0.05$ ; One-way ANOVA test). In two follow-up experiments, we tested  
96 whether the cease in heat flow was related to electron acceptor or -donor limitation by 1) opening the  
97 wells to let in new atmospheric air after the thermogram had reached zero after which we observed a  
98 second peak, and 2) by adding 10mM  $\text{NO}_3^-$ . When this was done, the total energy increased by ~35%  
99 for the alginate embedded biofilm, and we concluded that, under the specifications used for these  
100 experiments, the heat flow reached zero due to electron acceptor limitation rather than carbon source  
101 limitation.

102 The recorded thermograms displayed some variation in temporal dynamics as well as in the  
103 magnitude of the heat flow within experiments. We tested possible explanations and inoculated  
104 increasing amounts of bacteria into alginate beads and as planktonic cells to test if the variation could  
105 be explained by bacterial concentration. These variations resulted in both lateral and horizontal shifts

106 in the position of peaks (Fig. S3) as also shown for other microbes previously (Braissant *et al.*, 2015;  
107 Wadsö *et al.*, 2017).

108 The number of viable bacteria in each well were generally not statistically different between models  
109 or preincubation times neither at the start or at the end of experiments ( $p > 0.05$ ; Tukey's multiple  
110 comparison test), though the 24h and 48h preincubated alginate beads contained more bacteria than  
111 the other models at the start of the experiment but not at the end ( $p < 0.01$ ; Tukeys multiple comparison  
112 test) (Fig. S1).

113

#### 114 Numerical model of metabolic output

115 To investigate the systematic differences in the thermograms between the different growth-models,  
116 we fitted the experimental data to a mathematical model, assuming that energy release was non-  
117 linearly correlated to bacterial concentration (competition for space) and O<sub>2</sub> availability. Metabolic  
118 curves of *P. aeruginosa* were then calculated based on the theoretical bacterial concentration curves.  
119 To simplify such a model, we ignored the differences in spatial organization and modeled the system  
120 as a well-mixed suspension, which is only valid for the planktonic culture at  $t=0$ . The parameters for  
121 the biofilm growth forms are thus to be seen as *effective*. For mathematical details on the model used,  
122 see Supporting Information.

123 We solved the coupled system of differential equations numerically to theoretical curves of  
124 metabolism (Fig. 3). We expect that many of the parameters are shared between the datasets, since  
125 we used the same species and strain of bacteria. We divided the data into four categories: AB  
126 inoculated at  $t = 0$  hours, AB at  $t = 24$  and 48 hours, PC, and SB and performed simultaneous fits on  
127 the four different growth-forms, forcing specific parameters to be shared (Table 1). The model  
128 represented the data well, although it did not describe the smaller secondary peaks observed. These  
129 may be a product of switching to electron acceptors with lower energy yields such as NO<sub>3</sub><sup>-</sup> or pyruvate  
130 which were not included in this model (see Discussion). The effective parameters obtained from the  
131 fits are shown in Table 1.

132 Evidently, the growth-model influences physiological parameters where, e.g. bacteria pre-inoculated  
133 in alginate beads showed higher death rates compared to when they were grown as planktonic culture  
134 and as a surface biofilm. The growth rate of AB(0) was lower than all the remaining conditions and  
135 also displayed the most substantial growth non-linearity evident from the different shape of the  
136 thermogram compared to the other growth-forms that were pre-incubated.

137

138 Cluster analysis

139 To assess whether thermograms of *P. aeruginosa* grown in different models showed distinct  
140 clustering, we made principal component analysis (PCA) with no scaling, which showed clear  
141 separation of the different models across the two first principal components (Fig. S2). Thermograms  
142 were recorded in models with varying times of preincubation of 0, 24, and 48 hours. In most cases,  
143 the model seemed to separate the thermograms as opposed to the preincubation time. However, the  
144 newly inoculated alginate beads (AB0) clustered independently of all other models and preincubation  
145 times primarily along the first principal component, which accounted for 55.4 % of the total variance.  
146 Interestingly, it seems that the switch from single-cell lifestyle to biofilm is explained by the second  
147 principal component, which accounted for 22.9 % of the total variance.

148  
149 Machine learning algorithm - Framework for detection of growth mode

150 To demonstrate the feasibility of using the obtained signals to distinguish the mode of growth, we  
151 applied machine learning algorithms to classify samples.

152 Again, we divided the data into four categories: AB inoculated at  $t = 0$  hours, AB at  $t = 24$  and 48  
153 hours, PC, and SB. Using a standard 50 % train-test split on the data, we employed a Gaussian Process  
154 with radial basis kernels and, with limited modifications, immediately obtained 100 % classification  
155 accuracy on the data. This demonstrated the quality of the data for segmenting the mode of growth.

156 To challenge this, we tried to limit the training data and see how well a Gaussian Process could do  
157 by only training with a single data point of each category. A major hindrance of using just a single  
158 data point of each category is that there is no information of data variation. To compensate for this,  
159 we augmented the data point with warped versions of itself. In particular, we employed smooth  
160 spatio-temporal warping kernels that distort the original signals in amounts that resemble the  
161 variations found in the original datasets (for further detail see SI).

162 Using just a single data point from each growth-form, we achieved a mean accuracy of 90.5 % using  
163 two principal components (classification accuracy for each category was 0.95 (AB0), 0.87  
164 (AB24,48), 0.88 (PC), and 0.94 (SB)). When we expanded to 9 data points from each growth form,  
165 the accuracy increased to 98 %, on average. Using 20 % of the entire dataset, we obtained 100 %  
166 accuracy on the data set directly.

167

168

169

## 170 Validation of classification approach

171 To further validate our method for classifying planktonic from biofilm growing bacteria, we tested  
172 the method on the gram-positive coccoid bacterium *Staphylococcus aureus*. Metabolic thermograms  
173 showed overall different shapes than displayed by *P. aeruginosa* (Fig. S6). We again tried to classify  
174 the samples using the machine learning algorithm using the same growth-form classifications as for  
175 *P. aeruginosa* (Fig. 5). Here, the clusters were slightly different from what was observed for *P.*  
176 *aeruginosa*. AB24, and -48 grouped independent of all other conditions but closer to AB0 than seen  
177 for *P. aeruginosa*. Surprisingly, the planktonic cultures grouped together with the 24 h preincubated  
178 surface biofilm while the 48 hour preincubated surface biofilm grouped closer with the other  
179 “biofilm-states”. The average classification accuracy for each category was 0.95 (AB0), 0.96  
180 (AB24,48), 0.56 (PC), and 0.39 (SB).

181

## 182 **Discussion**

183 Since the first descriptions of biofilm in modern microbiology around 40 years ago (Geesey *et al.*,  
184 1977; Høiby, 1977; Jendresen and Glantz, 1981; McCoy *et al.*, 1981), considerable scientific research  
185 has focused on discovering which factors define a biofilm. Many biomarkers have been proposed,  
186 such as the irreversible attachment to a surface, deployment of quorum sensing (QS) systems, overall  
187 altered transcription profile, and increased antibiotic tolerance. However, the only consistent  
188 “biofilm-phenotypes” are physical aggregation (attached as well as non-attached) and increased  
189 antibiotic tolerance. The mechanism that governs this increased tolerance is continuously debated  
190 and has, for some types of antibiotics, been linked to protection by matrix components (Tseng *et al.*,  
191 2013; Cao *et al.*, 2016; Goltermann and Tolker-Nielsen, 2017) or slow growth of the bacteria (Pamp  
192 *et al.*, 2008).

193 But still, the classification of planktonic and biofilm growing bacteria is a complex task both  
194 experimentally and diagnostically. Evidently, we do not have other direct biomarkers than  
195 microscopic visualization to distinguish single cells and biofilms, which is impractical for routine  
196 purposes, such as in diagnostics. Here, we show that microcalorimetric measurements of metabolic  
197 energy release combined with a novel data analysis approach were able to differentiate the two growth  
198 forms.

199 Calorimetry has traditionally been used in materials research, using either isothermal titration  
200 calorimetry to determine, e.g. the Gibbs free energy ( $\Delta G$ ) of the binding of ligands to macromolecules  
201 or as differential scanning calorimetry to assess the stability of, e.g. proteins (Krell, 2008). In life



202 sciences, isothermal microcalorimetry has been used to discriminate treatments or bacteria (Solokhina  
203 *et al.*, 2017; Butini *et al.*, 2019) and also to estimate minimum inhibitory concentrations (MIC) of  
204 antibiotics (Tellapragda *et al.*, 2020). Simplistic measures such as maximum heat flow, total energy  
205 release, time to peak, etc. might be sufficient in some cases, but also ignore fundamental differences  
206 in the shape of the thermograms that may be related to characteristic metabolic processes.

207

#### 208 Metabolic differences between single cells and biofilms

209 The total energy in each well was not different between the models and is ultimately linked to either  
210 the availability of electron acceptors or -donors for respiration in the sealed well and we found total  
211 released energy similar to what was seen before (Braissant *et al.*, 2015). Here we showed that the  
212 cease in metabolism was related to electron acceptor- rather than electron donor availability by  
213 supplementing with  $\text{NO}_3^-$ . *P. aeruginosa* is able to grow anaerobically with high biomass yield on  
214  $\text{NO}_3^-$  (Strohm *et al.*, 2007; Line *et al.*, 2014) and further on arginine and pyruvate fermentation  
215 (Eschbach *et al.*, 2004; Schreiber *et al.*, 2006) and reduction-oxidation reactions of self-produced  
216 phenazines (Price-Whelan *et al.*, 2007). This supports the current setup for studying clinical biofilm  
217 where multiple studies have showed that bacterial metabolism is halted by electron acceptor  
218 availability (Kragh *et al.*, 2014; Jensen *et al.*, 2017) rather than carbon source.

219 We developed a numerical model that allows us to guess about the determining factors during growth.  
220 In this model, we chose to make it as simple as possible and only include two parameters (growth  
221 and  $\text{O}_2$  consumption) to see how much of the data could be explained by these simple factors. By  
222 making global fits where some parameters were kept constant between the growth-models (Table 1),  
223 the numerical model was able to explain a surprisingly high proportion of the thermograms by only  
224 fitting growth/die rates, initial concentration of bacteria, and a growth nonlinearity constant  $K_a$ . All  
225 fits had  $R^2$  values of  $>0.9$  and, not surprisingly, the fit for the planktonic culture was highest, since  
226 the model assumed a homogenous distribution of cells.

227 Such simple models cannot capture the complexity of the myriad of different metabolic pathways  
228 that *P. aeruginosa* can employ (Sønderholm *et al.*, 2017a). Therefore, the secondary peak was not  
229 captured well by the model. This peak may be linked to a switch to alternative and lower yield  
230 metabolism as a response to the deprivation of  $\text{O}_2$  which is known to initiate the transcription of a  
231 suite of different genes (Guest, 1992) regulated by the concentration of different electron acceptors  
232 using e.g., FNR-type regulators (Unden and Schirawski, 1997). Additionally, the slow growth of  
233 biofilms is not necessarily equivalent to a low metabolic activity, as part of the metabolic energy will



234 be used for maintenance and other growth unrelated processes (Kiviet *et al.*, 2014; Monod, 1949;  
235 Sherman and Albus, 1924) not accounted for by this model. The numerical model suggested that *P.*  
236 *aeruginosa* grown in alginate beads was associated with higher death rates than the other models. For  
237 simplicity, we used the term death rate, but it might better be explained by a switch to an inactive  
238 state, as it has previously been shown that bacteria can resume growth after prolonged starvation and  
239 electron acceptor depletion (Kvich *et al.*, 2019).

240 Interestingly, it seems that there are also fundamental metabolic differences between surface-attached  
241 and embedded biofilms. From this study, the mechanism by which they differ remains speculative  
242 but could be related to the differences in resource stratification experienced by bacteria in the different  
243 models. In the surface attached biofilm, a thin layer of cells was adherent to the bottom and sides of  
244 the well, and they will experience a less steep gradient of electron acceptor and carbon source. As a  
245 result of the more pronounced resource gradient in the alginate beads, a gradient of individual  
246 aggregate sizes is seen from the bead edge toward the center (Sønderholm *et al.*, 2017b) with free  
247 space between aggregates. It has been shown that such zonation can create individual compartments  
248 with distinct pharmacokinetics (Christophersen *et al.*, 2020) and we speculate that the  
249 microenvironmental characteristics could also cause distinct metabolic compartments (Kirketerp-  
250 Møller *et al.*, 2020).

251

#### 252 Machine learning algorithm differentiates growth form

253 To analyze fundamental differences in the thermograms, we performed PCA analysis to investigate  
254 if clustering between groups existed (Fig. S2). From the PCA plot, it was evident that the three  
255 different growth forms had distinct signatures. This is a novel way of analyzing microcalorimetric  
256 data where the dimensionality of raw signals is reduced while minimizing information loss. To  
257 explore if we could use these signals as a potential “biofilm-biomarker” we designed an algorithm to  
258 analyze raw microcalorimeter signals. We used a warping function technique (Fig. S4) for correcting  
259 signals that vary in temporal dynamics, as taking the average of such signals will produce a smoothed-  
260 out version with none of the original features. In addition, we also used a warping function to correct  
261 for the difference in magnitude of heat flow signals. The warping in two dimensions allows for  
262 comparing more fundamental differences in the shape of the thermograms and not only use predefined  
263 parameters to describe differences or similarities with the risk of missing characteristic metabolic  
264 features.

265 By combining the dynamic warping approach and data augmentation, the variation of day to day  
266 experiments and small operator differences are widely imitated by producing variance by multiple  
267 iterations making the algorithm more robust. Resultantly, the algorithm was able to accurately  
268 classify each sample into the correct category for *P. aeruginosa*. The algorithm was designed using  
269 the thermograms of *P. aeruginosa* and was validated on *S. aureus* using the same classification  
270 categories into the specific growth-models. As these two microbes are distinct in both their  
271 metabolism, morphology and cell wall composition (gram positive vs negative), we did not expect  
272 them to fall into the exact same categories. However, there still seems to be a separation between the  
273 “biofilm-state” and single cell state for *S. aureus* except for the 24 h preincubated surface biofilm that  
274 clustered closer to the planktonic cultures. The algorithm was trained with a data point from the 24 h  
275 preincubated surface biofilm which resulted in the poor classification accuracy for the combined  
276 SB(24,48) category. This could have been accounted for by splitting this data into two separate  
277 categories. Similarly, the PC category overlaps with the SB category. From this study, it is unknown  
278 why the 24 h preincubated surface biofilm share more metabolic features with the planktonic culture  
279 but we speculate that *S. aureus* surface biofilms could need more time to change their metabolism  
280 into a “mature” biofilm phenotype than *P. aeruginosa*.

281

## 282 Conclusions

283 Recently, it was shown that different bacterial species, organisms, and tissues displayed visually  
284 distinct thermograms (Braissant *et al.*, 2015). Here, we propose a quantitative framework that could  
285 be used to classify different microbes and tissues based on their metabolic flux profiles. However, it  
286 is essential to note that the algorithm in its current form is a proof of concept that was developed  
287 using *in vitro* data. In e.g., infections, there will most likely be a mix of not only different species but  
288 also a mix of single cells and aggregates. The ability of our approach to differentiate such situations  
289 remains to be tested but we speculate that sophisticated analysis can successfully decipher such  
290 complex signals, similar to the process of spectral deconvolution.

291 Using our non-biased algorithm directly on the raw microcalorimetric data, we have elucidated that  
292 the specific heat flow of a bacterial culture reveals whether it is planktonic or biofilm growing which  
293 may be used as a biofilm biomarker. The biomarker can potentially be used as a diagnostic tool  
294 detecting the presence of different bacterial species and their growth state. Additionally, the analysis  
295 approach can also be used generally to classify differences in thermograms.

## 296 **Materials and methods**

### 297 Strains and growth conditions

298 We used a wild type *P. aeruginosa*, PAO1 strain obtained from the *Pseudomonas* Genetic Stock  
299 Center, ECU, USA (strain PAO0001) and a wild type *S. aureus* strain (NCTC8325) for  
300 microcalorimetric measurements. For microscopy, we used a PAO1 tagged with a stable green  
301 fluorescent protein (GFP) constitutively expressed by plasmid pMRP9 (Bjarnsholt *et al.*, 2005). All  
302 experiments were performed at 37 °C in R2A broth (Lab M Ltd, UK) supplemented with 0.05 M  
303 Tris-HCl buffer (pH = 7.6) and 0.5 % glucose (henceforth mentioned as R2A media). Overnight (ON)  
304 cultures were started according to (Kragh *et al.*, 2017) in R2A media.

305

### 306 Preparation of planktonic cultures, surface-attached biofilms, and alginate beads

307 All samples were prepared inside plastic inserts (non-activated calWells, Symcel, Sweden). For  
308 surface-attached biofilms, the ON culture was diluted to a final optical density (OD<sub>450</sub>) of 0.005 with  
309 fresh R2A media. A 200 µL aliquot of diluted culture was inoculated into each insert, covered with  
310 parafilm, and incubated for either 24 or 48 hours at 37 °C, 120 rpm. This allowed biofilm to develop  
311 on the sides and bottom of the insert. Each insert was then washed with saline (0.9% NaCl) to remove  
312 planktonic biomass. After washing, 200 µL fresh R2A media was added and the insert was positioned  
313 in the calPlate (Symcel, Sweden).

314 For planktonic cultures, the ON culture was filtered through a sterile, syringe filter ( $\phi_{\text{pore}} = 10\mu\text{m}$ ) to  
315 remove aggregated bacteria. The filtered culture was then diluted to an OD<sub>450</sub> of 0.005 with fresh  
316 R2A media. An aliquot of 200 µL was added to each insert and positioned in the calPlate (Symcel,  
317 Sweden).

318 Alginate beads containing bacteria were produced as previously described (Sønderholm *et al.*,  
319 2017b). Alginate beads were produced by mixing seaweed alginate (2% w/v) (Protanal LF 10/60 FT;  
320 FMC Biopolymer, Norway) with an ON culture adjusted to an OD<sub>450</sub> of 2 to a final OD<sub>450</sub> of 0.1.  
321 Beads were formed by extrusion dropping through a 21-gauge needle placed 3 cm above the surface  
322 of a stirred 0.25 M CaCl<sub>2</sub> solution and left to harden for 1 h, producing beads of  $\phi = 2.4$  mm  
323 (Sønderholm *et al.*, 2017b). Beads were rinsed in 0.9% saline and transferred to prewarmed (37 °C)  
324 R2A media. The beads were incubated in R2A media at 100 rpm at 37 °C for either 0, 24, or 48 hours.  
325 After incubation, beads were gently rinsed in 0.9 % saline to remove non-embedded cells from the  
326 bead surface. A single bead was then placed in each insert, the insert was filled with 190 µL fresh  
327 R2A media, resulting in a final volume of 200 µL in the insert. The insert was then positioned in the

328 calPlate (Symcel, Sweden). Microcalorimetric measurements of *S. aureus* were performed identically  
329 to *P. aeruginosa*, but with Mueller-Hinton broth containing with 10mM KNO<sub>3</sub> instead of R2A  
330 medium.

331

### 332 Microcalorimeter procedure

333 Microcalorimetric measurements were conducted according to the manufacturer's procedures and  
334 guidelines (Symcel, Sweden) and as previously described (Braissant *et al.*, 2015; Wadsö *et al.*, 2017).  
335 Each plastic insert was placed inside sterile, titanium cylinders with forceps. Each cylinder was sealed  
336 with a titanium lid and tightened to identical torque (40 cNm). A rack of 48 cylinders, including 32  
337 samples and 16 references (filled with sterile media), was inserted into the microcalorimeter  
338 (calScreener, Symcel, Sweden) running the software calView 1.033. The rack was preheated in  
339 position 1 for 10 minutes, then moved to position 2 for 20 minutes before being moved into the  
340 measuring chamber. The wells were stationary during measurements and the system was allowed to  
341 equilibrate for approximately 30 minutes before stable signals were recorded. Measurements of heat  
342 flow (in  $\mu\text{W}$ ) were recorded at a rate of 1 hertz.

343

### 344 Numerical model

345 We constructed a system of coupled differential equations and solved them numerically to theoretical  
346 curves of metabolism, assuming that the metabolic behavior was non-linearly dependent on bacterial  
347 concentration and the O<sub>2</sub> availability in the wells. For details, please see Supporting Information.

348

### 349 Machine learning algorithm

350 We employed Gaussian Processes (Pedregosa *et al.*, 2011) as the base machine learning algorithm.  
351 To augment single data points, we employed Gaussian warping functions. Briefly, we chose a small  
352 number M (M=5 here) and defined the warped signal of  $f(t)$ ,  $\in [0, T]$  as:

$$353 \quad f^w(t) = f\left(t + \sum_{i=0}^M a_i w_i(t)\right) + \sum_{i=0}^M b_i w_i(t)$$

354 where

$$355 \quad w_i(t) = \frac{e^{-\frac{t - \frac{iT}{M}}{2\left(\frac{T}{M}\right)^2}}}{\sum_j e^{-\frac{t - \frac{jT}{M}}{2\left(\frac{T}{M}\right)^2}}$$

356 Here  $\{a_i\}$  and  $\{b_i\}$  are control points that determine smooth time shifts and smooth value shifts,  
357 respectively. These  $2 \times M$  values can be chosen to map one curve onto another as best as possible. In  
358 this sense, this is similar to a soft dynamic time warping with added value warping. See Supporting  
359 Information for details.

360 These warping functions were also used to generate augmented data for the training of the algorithm.  
361 In particular, we drew random numbers for  $\{a_i\}$  and  $\{b_i\}$ . The result of this is shown in Fig. S5.

362

### 363 Statistics

364 ANOVAs and Tukey's Multiple Comparison tests were performed in Prism (v. 7.0 GraphPad, USA).  
365 Principal component analysis was made in R (v. 3.6.3). Numerical model, and the machine learning  
366 algorithm was made in Python. CalScreener measurements were conducted with four technical  
367 replicates and four independent biological replicates from experiments conducted at four separate  
368 time points for *P. aeruginosa* and 4 technical replicates and three independent biological replicates  
369 from experiments conducted at three separate time points for *S. aureus*.

370

### 371 **Author contributions**

372 ML, KK, and TB conceived and outlined the study, ML and KK performed experiments, ML, KK,  
373 BF, JK, and TB analyzed the data, JK performed mathematical simulations and made the machine  
374 learning algorithm, ML, KK, BF, JK and TB wrote the paper.

375

### 376 **Acknowledgments**

377 This study was supported by the Lundbeck Foundation through grant R250-2017-633 (ML) and  
378 R105-A9791 (TB) and the Novo Nordic Foundation through grants NNF19OC0056411 and  
379 NNF19OC0054390 (TB). We thank Symcel for excellent technical assistance during the start-up of  
380 the project.

381 **References**

- 382 Alhede M, Kragh KN, Qvortrup K, Allesen-Holm M, van Gennip M, Christensen LD, *et al.* (2011).  
383 Phenotypes of non-attached *Pseudomonas aeruginosa* aggregates resemble surface attached  
384 biofilm. Webber MA (ed). *Plos One* **6**: e27943.
- 385 Baldoni D, Hermann H, Frei R, Trampuz A, Steinhuber A. (2009). Performance of  
386 microcalorimetry for early detection of methicillin resistance in clinical isolates of *Staphylococcus*  
387 *aureus*. *Journal of Clinical Microbiology* **47**: 774–776.
- 388 Bartell JA, Sommer LM, Haagensen JAJ, Loch A, Espinosa R, Molin S, *et al.* (2019). Evolutionary  
389 highways to persistent bacterial infection. *Nature Communications* **10**: 629.
- 390 Bernier SP, Lebeaux D, DeFrancesco AS, Valomon A, Soubigou G, Coppée J-Y, *et al.* (2013).  
391 Starvation, together with the SOS response, mediates high biofilm-specific tolerance to the  
392 fluoroquinolone ofloxacin Viollier PH (ed). *PLoS Genet* **9**: e1003144–14.
- 393 Bjarnsholt T, Alhede M, Alhede M, Eickhardt-Sørensen SR, Moser C, Kühl M, *et al.* (2013). The *in*  
394 *vivo* biofilm. *Trends Microbiol* **21**: 466–474.
- 395 Bjarnsholt T, Jensen PØ, Burmølle M, Hentzer M, Haagensen J, Hougen HP, *et al.* (2005).  
396 *Pseudomonas aeruginosa* tolerance to tobramycin, hydrogen peroxide and polymorphonuclear  
397 leukocytes is quorum-sensing dependent. *Microbiology (Reading, Engl)* **151**: 373–383.
- 398 Braissant O, Keiser J, Meister I, Bachmann A, Wirz D, Göpfert B, *et al.* (2015). Isothermal  
399 microcalorimetry accurately detects bacteria, tumorous microtissues, and parasitic worms in a label-  
400 free well-plate assay. *Biotechnol J* **10**: 460–468.
- 401 Butini ME, Abbandonato G, Di Rienzo C, Trampuz A, Di Luca M. (2019). Isothermal  
402 microcalorimetry detects the presence of persister cells in a *Staphylococcus aureus* biofilm after  
403 vancomycin treatment. *Front Microbiol* **10**: 332.
- 404 Cao B, Christophersen L, Kolpen M, Jensen PØ, Sneppen K, Hoiby N, *et al.* (2016). Diffusion  
405 Retardation by Binding of Tobramycin in an Alginate Biofilm Model. Coenye T (ed). *Plos One* **11**:  
406 e0153616.
- 407 Christophersen L, Schwartz FA, Lerche CJ, Svanekjær T, Kragh KN, Laulund AS, *et al.* (2020). In  
408 vivo demonstration of *Pseudomonas aeruginosa* biofilms as independent pharmacological  
409 microcompartments. *J Cyst Fibros*. e-pub ahead of print, doi: doi.org/10.1016/j.jcf.2020.01.009.
- 410 Ciofu O, Tolker-Nielsen T. (2019). Tolerance and resistance of *Pseudomonas aeruginosa* biofilms  
411 to antimicrobial agents - how *P. aeruginosa* can escape antibiotics. *Front Microbiol* **10**: 114–31.
- 412 Corte L, Casagrande Pierantoni D, Tascini C, Roscini L, Cardinali G. (2019). Biofilm specific  
413 activity: a measure to quantify microbial biofilm. *Microorganisms* **7**: 73.
- 414 Costerton JW, Lewandowski Z, Caldwell DE, Korber DR, Lappin-Scott HM. (1995). Microbial  
415 Biofilms. *Annual Review of Microbiology* **49**: 711–745.



- 416 Eschbach M, Schreiber K, Trunk K, Buer J, Jahn D, Schobert M. (2004). Long-term anaerobic  
417 survival of the opportunistic pathogen *Pseudomonas aeruginosa* via pyruvate fermentation. *J*  
418 *Bacteriol* **186**: 4596–4604.
- 419 Folsom JP, Richards L, Pitts B, Roe F, Ehrlich GD, Parker A, *et al.* (2010). Physiology of  
420 *Pseudomonas aeruginosa* in biofilms as revealed by transcriptome analysis. *BMC Microbiol* **10**:  
421 294.
- 422 Frimodt-Møller J, Rossi E, Haagensen JAJ, Falcone M, Molin S, Johansen HK. (2018). Mutations  
423 causing low level antibiotic resistance ensure bacterial survival in antibiotic-treated hosts. *Sci Rep-*  
424 *Uk* **8**: 12512.
- 425 Geesey GG, Richardson WT, Yeomans HG, Irvin RT, Costerton JW. (1977). Microscopic  
426 examination of natural sessile bacterial populations from an alpine stream. *Canadian Journal of*  
427 *Microbiology* **23**: 1733–1736.
- 428 Goltermann L, Tolker-Nielsen T. (2017). Importance of the exopolysaccharide matrix in  
429 antimicrobial tolerance of *Pseudomonas aeruginosa* aggregates. *Antimicrob Agents Ch* **61**: e02696–  
430 16.
- 431 Guest JR. (1992). Oxygen-regulated gene expression in *Escherichia coli*. *Microbiology (Reading,*  
432 *Engl)* **138**: 2253–2263.
- 433 Hauser AR. (2011). *Pseudomonas aeruginosa*: So many virulence factors, so little time. *Critical*  
434 *Care Medicine* **39**: 2193–2194.
- 435 Høiby N. (1977). *Pseudomonas aeruginosa* infection in cystic fibrosis. Diagnostic and prognostic  
436 significance of *Pseudomonas aeruginosa* precipitins determined by means of crossed  
437 immunoelectrophoresis. A survey. *Acta pathologica et microbiologica Scandinavica Supplement* 1–  
438 96.
- 439 Jefferson KK. (2004). What drives bacteria to produce a biofilm? *FEMS Microbiol Lett* **236**: 163–  
440 173.
- 441 Jendresen MD, Glantz P-O. (1981). Clinical adhesiveness of selected dental materials. *Acta*  
442 *Odontologica Scandinavica* **39**: 39–45.
- 443 Jensen PØ, Kolpen M, Kragh KN, Kühl M. (2017). Microenvironmental characteristics and  
444 physiology of biofilms in chronic infections of CF patients are strongly affected by the host immune  
445 response. Calum H, Moser C (eds). *APMIS* **125**: 276–288.
- 446 Kirketerp-Møller K, Stewart PS, Bjarnsholt T. (2020). The Zone Model: A conceptual model for  
447 understanding the microenvironment of chronic wound infection. *Wound Repair Regen.* e-pub  
448 ahead of print, doi: 10.1111/wrr.12841.
- 449 Kiviet DJ, Nghe P, Walker N, Boulineau S, Sunderlikova V, Tans SJ. (2014). Stochasticity of  
450 metabolism and growth at the single-cell level. *Nature* **514**: 376–379.



- 451 Kolpen M, Lerche CJ, Kragh KN, Sams T, Koren K, Jensen AS, *et al.* (2017). Hyperbaric oxygen  
452 sensitizes anoxic *Pseudomonas aeruginosa* biofilm to ciprofloxacin. *Antimicrob Agents Ch* **61**:  
453 e01024–17.
- 454 Kragh KN, Alhede M, Jensen PØ, Moser C, Scheike T, Jacobsen CS, *et al.* (2014).  
455 Polymorphonuclear leukocytes restrict growth of *Pseudomonas aeruginosa* in the lungs of cystic  
456 fibrosis patients McCormick BA (ed). *Infect Immun* **82**: 4477–4486.
- 457 Kragh KN, Alhede M, Rybtke M, Stavnsberg C, Jensen PØ, Tolker-Nielsen T, *et al.* (2017).  
458 Inoculation method could impact the outcome of microbiological experiments. *Appl Environ*  
459 *Microb* AEM.02264–17.
- 460 Kragh KN, Hutchison JB, Melaugh G, Rodesney C, Roberts AEL, Irie Y, *et al.* (2016). Role of  
461 Multicellular Aggregates in Biofilm Formation. *mBio* **7**: e00237.
- 462 Krell T. (2008). Microcalorimetry: a response to challenges in modern biotechnology. *Microb*  
463 *Biotechnol* **1**: 126–136.
- 464 Kvich L, Fritz B, Crone S, Kragh KN, Kolpen M, Sønderholm M, *et al.* (2019). Oxygen restriction  
465 generates difficult-to-culture *P. aeruginosa*. *Front Microbiol* **10**: 1992.
- 466 Line L, Alhede M, Kolpen M, Kühl M, Ciofu O, Bjarnsholt T, *et al.* (2014). Physiological levels of  
467 nitrate support anoxic growth by denitrification of *Pseudomonas aeruginosa* at growth rates  
468 reported in cystic fibrosis lungs and sputum. *Front Microbiol* **5**: 554.
- 469 McCoy WF, Bryers JD, Robbins J, Costerton JW. (1981). Observations of fouling biofilm  
470 formation. *Canadian Journal of Microbiology* **27**: 910–917.
- 471 Monod J. (1949). The growth of bacterial cultures. *Annual Review of Microbiology* **3**: 371–394.
- 472 Nguyen D, Joshi-Datar A, Lepine F, Bauerle E, Olakanmi O, Beer K, *et al.* (2011). Active  
473 Starvation Responses Mediate Antibiotic Tolerance in Biofilms and Nutrient-Limited Bacteria.  
474 *Science* **334**: 982–986.
- 475 Pamp SJ, Gjermansen M, Johansen HK, Nielsen TT. (2008). Tolerance to the antimicrobial peptide  
476 colistin in *Pseudomonas aeruginosa* biofilms is linked to metabolically active cells, and depends on  
477 the pmr and mexAB-oprM genes. *Mol Microbiol* **68**: 223–240.
- 478 Pedregosa F, Varoquaux G, Gramfort A, Michel V, Thirion B, Grisel O, *et al.* (2011). Scikit-learn:  
479 Machine Learning in Python. *Journal of Machine Learning Research* **12**: 2825–2830.
- 480 Poulsen LK, Ballard G, Stahl DA. (1993). Use of rRNA fluorescence in situ hybridization for  
481 measuring the activity of single cells in young and established biofilms. *Appl Environ Microb* **59**:  
482 1354–1360.
- 483 Price-Whelan A, Dietrich LEP, Newman DK. (2007). Pyocyanin alters redox homeostasis and  
484 carbon flux through central metabolic pathways in *Pseudomonas aeruginosa* PA14. *J Bacteriol*  
485 **189**: 6372–6381.

- 486 Rosenberg M, Azevedo NF, Ivask A. (2019). Propidium iodide staining underestimates viability of  
487 adherent bacterial cells. *Sci Rep-Uk* **9**: 1–12.
- 488 Schreiber K, Boes N, Eschbach M, Jaensch L, Wehland J, Bjarnsholt T, *et al.* (2006). Anaerobic  
489 survival of *Pseudomonas aeruginosa* by pyruvate fermentation requires an Usp-type stress protein.  
490 *J Bacteriol* **188**: 659–668.
- 491 Secor PR, Michaels LA, Ratjen A, Jennings LK, Singh PK. (2018). Entropically driven aggregation  
492 of bacteria by host polymers promotes antibiotic tolerance in *Pseudomonas aeruginosa*.  
493 *Proceedings of the National Academy of Sciences of the United States of America* **115**: 10780–  
494 10785.
- 495 Sherman JM, Albus WR. (1924). The function of lag in bacterial cultures. *J Bacteriol* **9**: 303–305.
- 496 Solokhina A, Brückner D, Bonkat G, Braissant O. (2017). Metabolic activity of mature biofilms of  
497 *Mycobacterium tuberculosis* and other non-tuberculous mycobacteria. *Sci Rep-Uk* **7**: 9225–7.
- 498 Stewart PS, Franklin MJ. (2008). Physiological heterogeneity in biofilms. *Nat Rev Microbiol* **6**:  
499 199–210.
- 500 Stewart PS, White B, Boegli L, Hamerly T, Williamson KS, Franklin MJ, *et al.* (2019). Conceptual  
501 Model of Biofilm Antibiotic Tolerance That Integrates Phenomena of Diffusion, Metabolism, Gene  
502 Expression, and Physiology O'Toole G (ed). *J Bacteriol* **201**: 2125–24.
- 503 Stewart PS, Zhang T, Xu R, Pitts B, Walters MC, Roe F, *et al.* (2016). Reaction-diffusion theory  
504 explains hypoxia and heterogeneous growth within microbial biofilms associated with chronic  
505 infections. *npj Biofilms and Microbiomes* **2**: 16012.
- 506 Strohm TO, Ben Griffin, Zumft WG, Schink B. (2007). Growth yields in bacterial denitrification  
507 and nitrate ammonification. *Appl Environ Microb* **73**: 1420–1424.
- 508 Sønderholm M, Bjarnsholt T, Alhede M, Kolpen M, Jensen PØ, Kühl M, *et al.* (2017a). The  
509 consequences of being in an infectious biofilm: Microenvironmental conditions governing  
510 antibiotic tolerance. *Int J Mol Sci* **18**: 2688.
- 511 Sønderholm M, Koren K, Wangpraseurt D, Jensen PØ, Kolpen M, Kragh KN, *et al.* (2018). Tools  
512 for studying growth patterns and chemical dynamics of aggregated *Pseudomonas aeruginosa*  
513 exposed to different electron acceptors in an alginate bead model. *npj Biofilms and Microbiomes* **4**:  
514 1–11.
- 515 Sønderholm M, Kragh KN, Koren K, Jakobsen TH, Darch SE, Alhede M, *et al.* (2017b).  
516 *Pseudomonas aeruginosa* aggregate formation in an alginate bead model system exhibits *in vivo*-  
517 like characteristics Drake HL (ed). *Appl Environ Microb* **83**: e00113–17.
- 518 Tellapragda C, Hasan B, Antonelli A, Maruri A, de Vogel C, Gijón D, *et al.* (2020). Isothermal  
519 microcalorimetry minimal inhibitory concentration testing in extensively drug resistant Gram-  
520 negative bacilli – A multicenter study. *Clinical Microbiology and Infection* 1–23.

- 521 Tseng BS, Zhang W, Harrison JJ, Quach TP, Song JL, Penterman J, *et al.* (2013). The extracellular  
522 matrix protects *Pseudomonas aeruginosa* biofilms by limiting the penetration of tobramycin.  
523 *Environ Microbiol* **15**: 2865–2878.
- 524 Uden G, Schirawski J. (1997). The oxygen-responsive transcriptional regulator FNR of  
525 *Escherichia coli* : the search for signals and reactions. *Mol Microbiol* **25**: 205–210.
- 526 Wadsö I, Hallén D, Jansson M, Suurkuusk J, Wenzler T, Braissant O. (2017). A well-plate format  
527 isothermal multi-channel microcalorimeter for monitoring the activity of living cells and tissues.  
528 *Thermochimica Acta* **652**: 141–149.
- 529 Whooley MA, McLoughlin AJ. (1982). The regulation of pyocyanin production in *Pseudomonas*  
530 *aeruginosa*. *European J Appl Microbiol Biotechnol* **15**: 161–166.
- 531

532 **Figure legends:**

533 Figure 1. Schematic drawing of the experimental conditions. *Pseudomonas aeruginosa* or  
534 *Staphylococcus aureus* was either grown as planktonic culture (PC), as surface-attached biofilm (SB),  
535 or as aggregates embedded in alginate beads (AB). The three models were measured in an isothermal  
536 microcalorimeter with 0h, 24h or 48h preincubation (surface-attached biofilm = only 24h and 48h  
537 preincubation). Microscope images were acquired on a confocal laser scanning microscope (Zeiss  
538 880LSM) using a strain of PAO1 with constitutively expressed GFP.

539

540 Figure 2. Example of thermograms for *Pseudomonas aeruginosa* grown A) in alginate beads, B) as  
541 planktonic culture, and C) as a surface biofilm. Colors correspond to preincubation times of 0h (red),  
542 24h (green) and 48h (blue).

543

544 Figure 3. Numerical model of metabolic output of *Pseudomonas aeruginosa* with non-linear  
545 dependencies on the concentration of bacteria and O<sub>2</sub>. Some parameters were kept constant between  
546 models, while others were allowed to be fitted (see Table 1 and main text). The main graph shows  
547 planktonic culture data (PC). Insets show fit to alginate bead biofilm (AB) and surface biofilm (SB).  
548 Blue circles represent empirical data, while orange lines are the fitted numerical model. R<sup>2</sup> values are  
549 shown in Table 1.

550

551 Figure 4. Machine learning classification algorithm developed for thermograms of *Pseudomonas*  
552 *aeruginosa* grown in alginate beads (AB), in planktonic culture (PC), and as surface biofilms (SB)  
553 with various preincubation times (0, 24, 48 hours). Large, solid circles represent the data points that  
554 were used to train the algorithm; small, solid circles represent the empirical data, and crosses represent  
555 the augmented data created by the warping functions. Contours show different categories where the  
556 gradient colors of the contours correspond to probability.

557

558 Figure 5. Machine learning classification algorithm applied on thermograms of *Staphylococcus*  
559 *aureus* grown in alginate beads (AB), in planktonic culture (PC), and as surface biofilms (SB) with  
560 various preincubation times (0, 24, 48 hours). Large, solid circles represent the data points that were  
561 used to train the algorithm; small, solid circles represent the empirical data, and crosses represent the  
562 augmented data created by the warping functions. Contours show different categories where the  
563 gradient colors of the contours correspond to probability.

564 *Table 1:*

565 *Fixed parameters among all fits in the numerical model*

| Yield<br>$1/Y$ ( $\text{h}^{-1}$ ) | Unit conversion<br>$a$ ( $\mu\text{W}$ ) | Non-growth $\text{O}_2$ consumption<br>$\varepsilon$ | Exponent<br>$\gamma_{\rho}$ | $\text{O}_2$ non-linearity<br>$k_c$ | Asymmetry exponent<br>$\gamma_c$ |
|------------------------------------|------------------------------------------|------------------------------------------------------|-----------------------------|-------------------------------------|----------------------------------|
| 0.13                               | 6.2                                      | 0.0020                                               | 3.5                         | 36                                  | 2.7                              |

566 *Variable parameters between fits in the numerical model*

|                | Growth rate<br>$\alpha$ ( $\text{h}^{-1}$ ) | Death rate<br>$\beta$ ( $\text{h}^{-1}$ ) | Initial concentration<br>$b(0)$ | Non-linearity<br>$K_a$ | Goodness of fit<br>$R^2$ |
|----------------|---------------------------------------------|-------------------------------------------|---------------------------------|------------------------|--------------------------|
| AB (0)         | 0.28                                        | 0.14                                      | 0.064                           | 1.40                   | 0.920                    |
| AB (24, 48)    | 0.96                                        | 0.25                                      | 0.23                            | 0.65                   | 0.970                    |
| PC (0, 24, 48) | 0.89                                        | 0.045                                     | 0.039                           | 0.64                   | 0.993                    |
| SB (24, 48)    | 0.87                                        | 0.049                                     | 0.12                            | 0.82                   | 0.990                    |

567

568

569

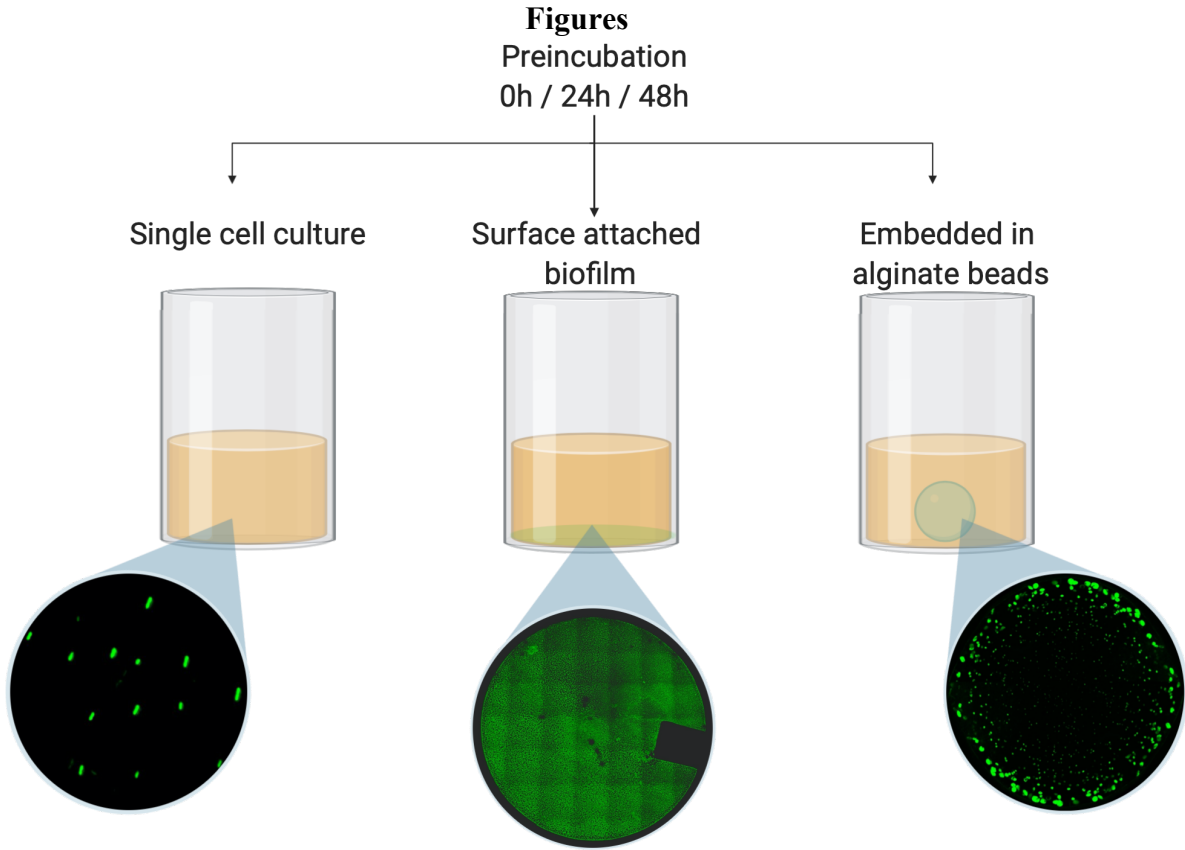

570

571

572

573

574

Fig. 1

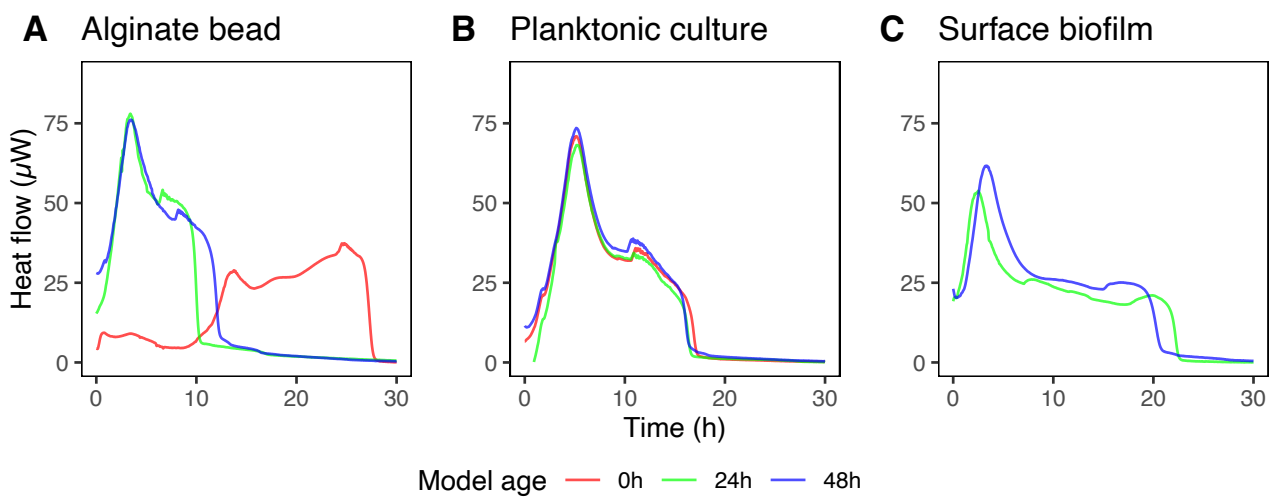

575

576

577

Fig. 2

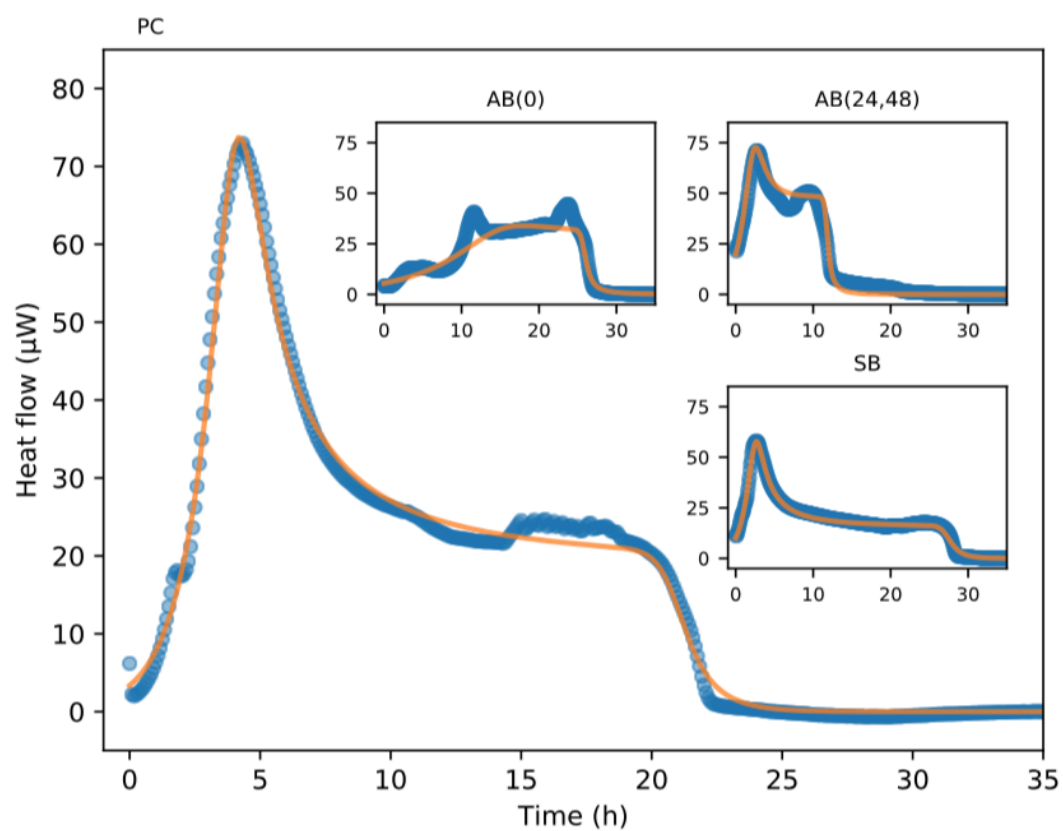

578

579

Fig. 3

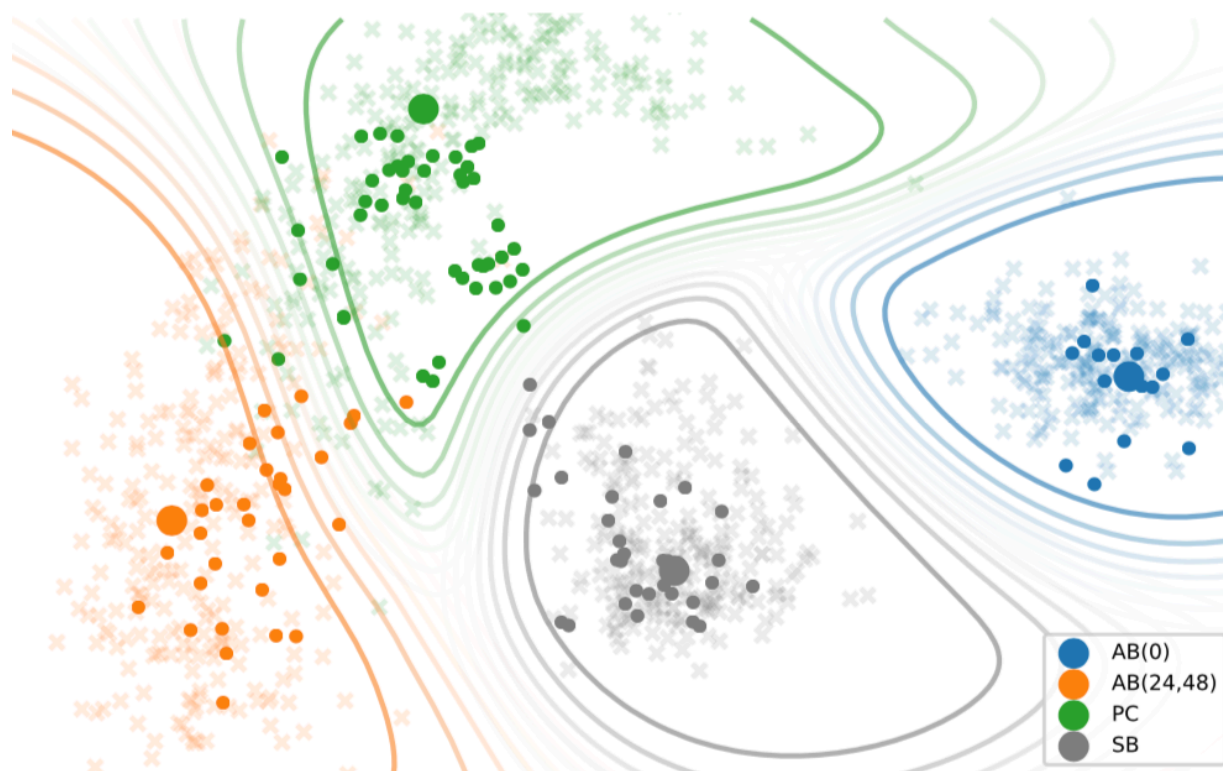

580

581

Fig. 4



582

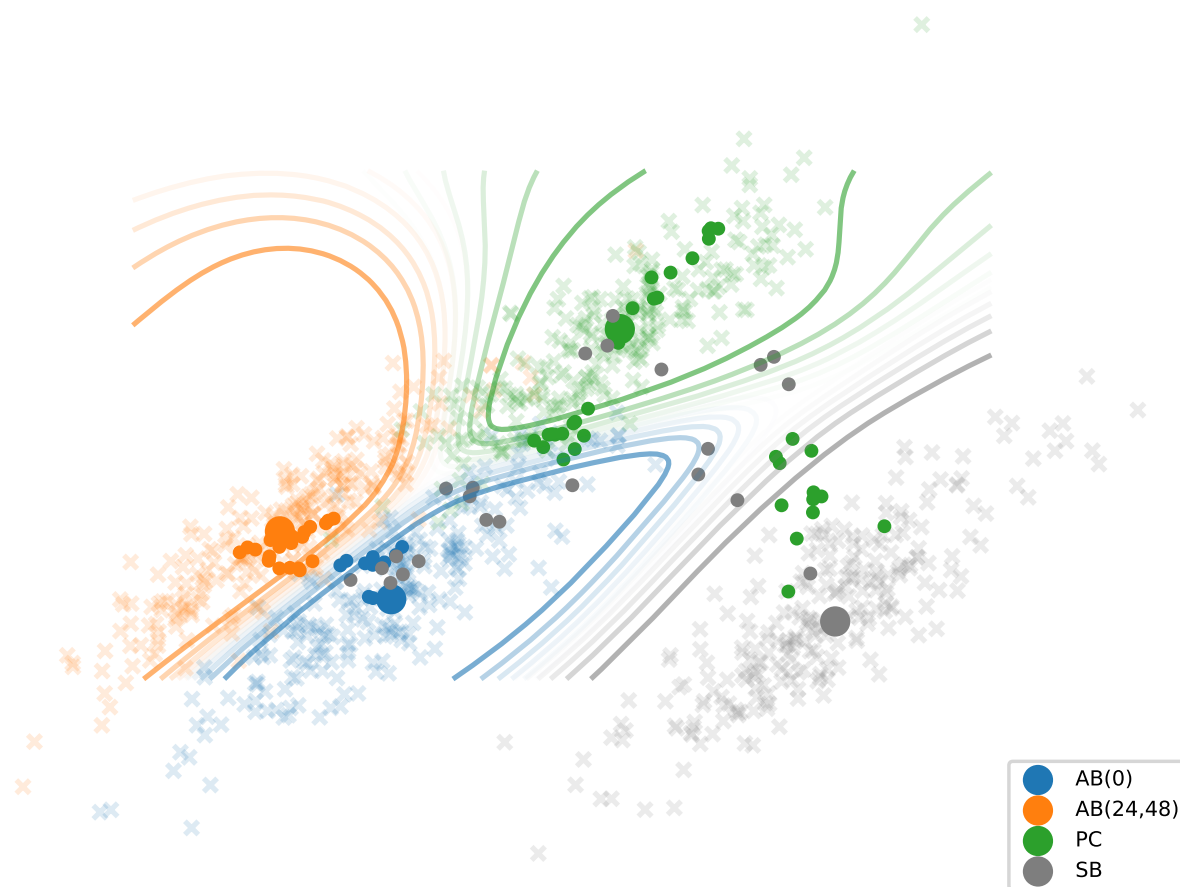

583

584

Fig. 5
